# Supplementary material for: STING is an intrinsic checkpoint inhibitor that restrains the TH17 cell pathogenic program
Source: PubMed Central journal article supplement — Cell Rep. Author manuscript; Available in PMC 2022 Jun 12. (PMC9188824; doi:10.1016/j.celrep.2022.110838), 2022-05-24
Supplement: NIHMS1810672-supplement-1.pdf [file NIHMS1810672-supplement-1.pdf]

**Supplemental information**

**STING is an intrinsic checkpoint inhibitor  
that restrains the T<sub>H</sub>17 cell pathogenic program**

**Luis Eduardo Alves Damasceno, Guilherme Cesar Martelossi Cebinelli, Mariane Font Fernandes, Daniele Carvalho Nascimento, Gabriel Azevedo Públio, Marco Aurélio Ramirez Vinolo, Sergio Costa Oliveira, Tim Sparwasser, Thiago Mattar Cunha, Fernando Queiroz Cunha, and José Carlos Alves-Filho**

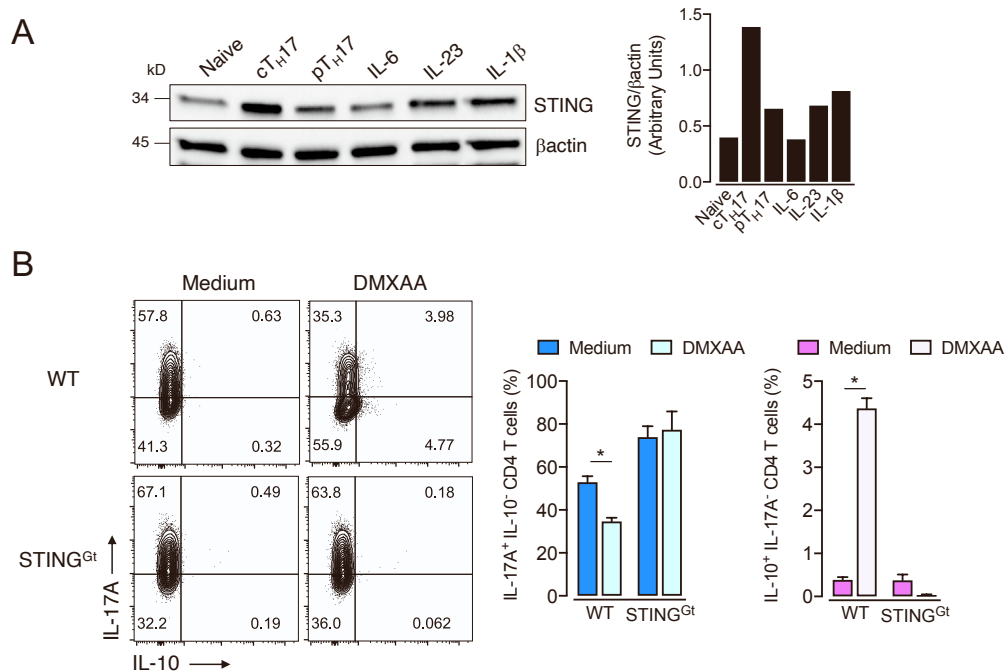

**Figure S1. STING expression is supported by the combination of IL-6 and TGFβ and a point mutation in STING phenocopies the effects observed with STING-deficient T<sub>H</sub>17 cells. Related to Figure 2.** (A) STING protein levels were evaluated in CD4 T cells cultured under c<sub>H</sub>17 or p<sub>H</sub>17-conditions or in the presence of rmIL-6, rmIL-23 and rmIL-1β alone for 72 h by immunoblot analysis. βactin was used as the loading control. (B) Naive CD4 T cells from WT or STING<sup>Gt</sup> mice were differentiated into c<sub>H</sub>17 cells in the presence of 10 μM DMXAA for 72 h, followed by flow cytometric analysis ( $n = 3$ ). Data are representative of two independent experiments and shown as mean ± SEM. \*P < 0.05 as determined by two-way ANOVA (B) followed by Tukey's post hoc test.

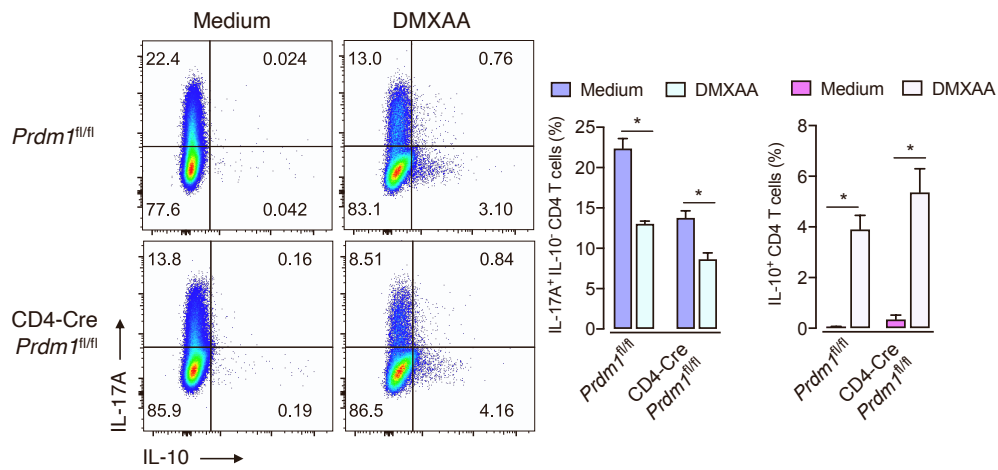

**Figure S2. Blimp-1 is not required for STING-induced IL-10 production in T<sub>H</sub>17 cells. Related to Figure 3.** Naive CD4 T cells from WT (*Prdm1<sup>fl/fl</sup>*) and Blimp-1-deficient (*CD4-Cre Prdm1<sup>fl/fl</sup>*) mice were cultured under cT<sub>H</sub>17-polarizing conditions in the presence or absence of 10  $\mu$ M DMXAA for 72 h, followed by flow cytometric analysis ( $n = 3-5$ ). Data are representative of two independent experiments and shown as mean  $\pm$  SEM. \* $P < 0.05$  as determined by two-way ANOVA followed by Tukey's post hoc test.

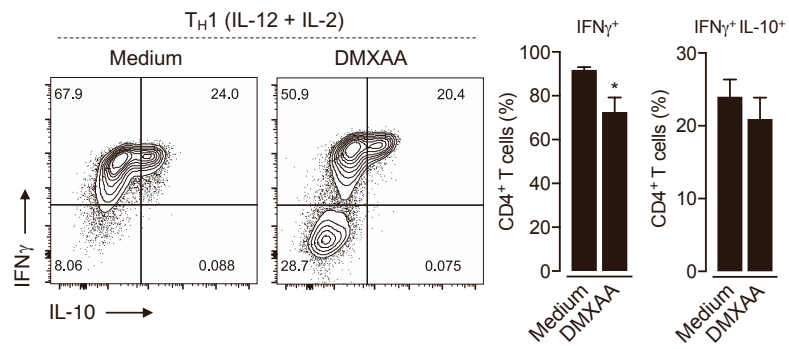

**Figure S3. STING activation does not alter IL-10 expression in T<sub>H</sub>1 cells. Related to Figure 3.** Naive CD4 T cells were cultured under T<sub>H</sub>1-skewing conditions in the presence or absence of 10  $\mu$ M DMXAA for 72 h, followed by flow cytometric analysis ( $n = 3$ ). Data are representative of two independent experiments and shown as mean  $\pm$  SEM. \* $P < 0.05$  as determined by two-tailed Student's t-test.

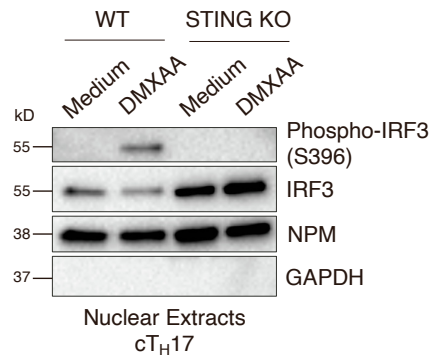

**Figure S4. Active IRF3 is localized in the nuclear compartment of T<sub>H</sub>17 cells in a STING-dependent manner. Related to Figure 4.** WT or STING-deficient naive CD4 T cells were differentiated into cT<sub>H</sub>17 cells for 72 h in the presence or absence of 10  $\mu$ M DMXAA and collected for nuclear fraction separation. Phospho-IRF3 and IRF3 levels were analyzed by immunoblot analysis. Nucleophosmin (NPM) was used as nuclear loading control. Data are representative of two independent experiments.
